# Supplementary material for: Chemical composition, optical properties, and oxidative potential of water- and methanol-soluble organic compounds emitted from the combustion of biomass materials and coal
Source: Copernicus journal article supplement (doi:10.5194/acp-21-13187-2021), 2021-09-06
Supplement: Supplementary file [file acp-21-13187-2021-supplement.pdf]

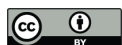

*Supplement of*

**Chemical composition, optical properties, and oxidative potential of water- and methanol-soluble organic compounds emitted from the combustion of biomass materials and coal**

**Tao Cao et al.**

*Correspondence to:* Jianzhong Song (songjzh@gig.ac.cn)

The copyright of individual parts of the supplement might differ from the article licence.

22 **CONTENTS:**

- 23 1. Biomass and coal samples
- 24 2. Collection of smoke samples from BB and CC
- 25 3. Extraction and fractionation of BrC
- 26 4. Organic carbon/elemental carbon (OC/EC) and total organic carbon (TOC) analysis
- 27 5. UV-visible properties
- 28 6. Principal component analysis (PCA)
- 29 7. Quality control
- 30 8. Table S1. Region, excitation/emission wavelength maxima range and attribution of
- 31 chromophores in BrC emitted from BB and CC
- 32 9. Table S2. Results of DTT assay conducted on the WSOC, HULIS and MSOC of smoke
- 33 samples
- 34 10. Figure S1. The normalized UV-vis spectra by organic carbon contents of WSOC, HULIS,
- 35 and MSOC fractions
- 36 11. Figure S2. EEM fluorescence counter maps of corresponding WSOC, HULIS, MSOC of
- 37 BB and CC smoke samples, presented as specific intensity (a.u. L(mg C<sup>-1</sup>))
- 38 12. Figure S3. <sup>1</sup>H-NMR stacking diagram of corresponding WSOC, HULIS, MSOC of BB
- 39 and CC smoke samples. The segment from 4.40 to 5.60 ppm was removed for NMR
- 40 spectra due to MeOH and H<sub>2</sub>O residues. The peaks were assigned to specific compounds
- 41 as follows: Levoglucosan (L), Phthalic acid (PA)

42

43

## 44 **S1. Biomass and coal samples**

45 In this study, six biomass materials and five types of coal were collected and burned to  
46 investigate the optical and chemical properties of brown carbon (BrC) fractions emitted from  
47 biomass burning (BB) and coal combustion (CC) smoke. The six biomass materials consisted  
48 of three types of crop straw (wheat straw [WS], rice straw [RS], and corn straw [CS]) and  
49 three types of wood (pine wood [PW], Chinese fir [CF], and white poplar [WP]). The three  
50 crop straws were chosen because they were the main types of crop straw burned in China.  
51 These crop straws are usually used as fuels for heating in the winter or cooking in rural areas  
52 throughout the year, and are also occasionally burned in agricultural fields after the harvest  
53 season (Ke et al., 2019). The three wood materials are widespread in forests and are  
54 commonly used as biomass fuels in some rural areas of China. The combustion of these crop  
55 straws and woods has been reported to make a significant contribution to the atmospheric  
56 aerosol in China (Fan et al., 2018; Shen et al., 2013). Therefore, these biomass materials were  
57 selected as representative biomass fuels for the study of BB-derived BrC. In this study, WS,  
58 RS, and CS were collected in the rural area of Bengbu, Anhui Province, China, while PW, CF,  
59 and WP were collected from a forest area in Lu'an, Anhui Province, China. Before the  
60 experiment, the crop straws and wood materials were washed with water and air dried for  
61 seven days.

62 In some developing countries, such as China, coal is still an important fuel in rural areas  
63 and also makes a large contribution to the levels of atmospheric pollution. In this study, five  
64 coals were chosen for the investigation of their BrC fractions from CC. They consisted of  
65 four bituminous coals (B-1, B-2, B-3, and B-4, with volatile fractions of 34%, 32%, 25%, and

66 19%, respectively) and one anthracitic coal (with a volatile fraction of 3.3%). These five  
67 coals represented the major types of coal used for residential CC in China. After collection,  
68 the coals were washed with water three times to remove dust and then air-dried. Then raw  
69 coal was crushed, fully mixed, and made into coal briquettes.

70

## 71 **S2. Collection of smoke samples from BB and CC**

72 Samples of the smoke emitted from BB and CC were collected in a combustion and  
73 sampling system that was introduced in our previous studies (Fan et al., 2018; Li et al., 2018).  
74 The instrument was made of stainless steel and consisted of a combustion hood, clean air  
75 dilution, and injection ports, smoke pipe, mixing fan, mixing chamber, PM<sub>2.5</sub> sampler  
76 (JCH-120F Intelligent medium flow PM sampler, Juchuang Environmental Protection Group  
77 Co., Ltd, Qindao, China), and exhaust port. The smoke samples emitted from BB and CC  
78 were then collected as follows:

79 (1) Biomass burning smoke samples. The biomass fuels were first prepared as small  
80 pieces (length ~10 cm) and then placed on a combustion stove. After dropping 1 mL of  
81 alcohol on the biomass fuels they were ignited with an electronic gas lighter. The smoke  
82 particles were diluted and transported into the mixing chamber. Finally, smoke particles were  
83 collected on quartz fiber filters (Ø 90 mm: Whatman, Maidstone, UK) in a PM<sub>2.5</sub> sampler at a  
84 flow rate of 80 L/min. Five complete experiments were conducted for each biomass fuel and  
85 five smoke PM<sub>2.5</sub> filter samples were obtained.

86 (2) Coal combustion smoke samples. The smoke particles emitted from the CC samples  
87 were also collected in the same combustion and sampling system. Sample collection was

88 conducted according to the method introduced by Li et al. (2018). Briefly, two anthracite  
89 briquettes were ignited in a burning coal honeycomb briquette stove and were then moved  
90 into the other coal stove. After the burning stage of coal was reached and smoke emissions  
91 were minimized, the coal stove was placed into the sampling system. Then, one honeycomb  
92 sample was placed in the pre-burned coal stove. The resulting smoke was diluted and passed  
93 into the mixing chamber. Finally, smoke samples were collected with the PM<sub>2.5</sub> sampler at a  
94 flow rate of 80 L/min. To obtain sufficient smoke sample for the comprehensive  
95 characterization of the BrC fractions, each coal was burned at least for three cycles. All  
96 quartz filters were baked for 6 h at 450 °C to remove any organics absorbed on the filters and  
97 then wrapped with baked aluminum foil. After sampling, the filter samples were re-wrapped  
98 with baked aluminum foil and stored in a refrigerator (−20 °C) prior to analysis.

99 Field blank quartz filters were collected before each group of combustion experiments  
100 under conditions in which the fuels were not ignited. The field blank filters were used to  
101 correct the mass of smoke PM<sub>2.5</sub> and water-/methanol- soluble BrC, as well as the optical  
102 signals and DTT consumption by BrC. To prevent contamination of the following sample, the  
103 collection system was cleaned before each new combustion experiment.

104

### 105 **S3. Extraction and fractionation of BrC**

106 The BrC fractions (i.e., water-soluble organic compounds [WSOC], humic-like  
107 substances [HULIS], and methanol-soluble organic compounds [MSOC]) were obtained with  
108 solvent extraction and a solid-phase extraction (SPE) method, as indicated in our previous  
109 studies (Fan et al., 2018; Fan et al., 2016; Li et al., 2018). The filter samples were

110 ultrasonically extracted three times with 20 mL ultrapure water for 30 min. The extracts were  
111 filtered through a 0.22  $\mu\text{m}$  polytetrafluoroethylene (PTFE) syringe filter to obtain the WSOC  
112 fraction. The HULIS fraction in WSOC was isolated with an SPE method (Chen and Bond,  
113 2010; Zhang et al., 2013; Cheng et al., 2016; Cheng et al., 2017). Briefly, the pH of the  
114 WSOC solution was acidified to 2 with HCl, and the solution introduced into a  
115 pre-conditioned SPE cartridge (Oasis HLB, 200 mg, Waters, Milford, MA, USA). The most  
116 hydrophilic species and inorganic salt ions or metal ions was removed by the cartridge,  
117 whereas the relatively hydrophobic HULIS fraction was retained. Then the SPE column was  
118 rinsed with pure water to remove inorganics and the retained organics were eluted with  
119 methanol. Finally, the HULIS solution was evaporated to dryness under a gentle nitrogen  
120 stream. It is noted that HULIS is less polar components of the WSOC, which were also  
121 usually refer to the relatively hydrophobic fraction of water-soluble organic carbon (Verma et  
122 al., 2012, Zheng et al., 2013, Katsumi et al., 2018).

123 The MSOC was obtained by a method developed by Cheng et al. (2016). Briefly, the  
124 filter samples were immersed in 20 mL methanol (Macklin, >99.9%, Shanghai, China) for 2 h  
125 and then filtered through a 0.22  $\mu\text{m}$  PTFE syringe filter (Jinteng, Tianjin, China). Static  
126 digestion without ultrasonic treatment can avoid the loss of particulate matter and facilitate  
127 the determination of dissolved organic matter content. Finally, the dried residual filters and  
128 untreated filters were analyzed to determine their carbon contents.

129

#### 130 **S4. Organic carbon/elemental carbon (OC/EC) and total organic carbon (TOC) analysis**

131 The OC and EC in smoke filter samples were measured using an OC/EC analyzer (TOT,

132 Sunset Laboratory Inc., Portland, OR, USA). The analysis was conducted according to the  
133 National Institute of Occupational Safety and Health (NIOSH) 870 method (Chow et al.,  
134 2001; Wu et al., 2016). The TOC content of WSOC and HULIS was determined by a  
135 high-temperature catalytic oxidation instrument (VCPH analyzer, Shimadzu, Kyoto, Japan)  
136 following the non-purgeable OC protocol. After the removal of inorganic carbon, the sample  
137 was oxidized at high temperature (680 °C) and the peak area of CO<sub>2</sub> was determined by a  
138 non-dispersive infrared detector. The content of the MSOC fraction was indirectly obtained  
139 by subtracting the TC concentrations of the extracted filters from that of the untreated filters.  
140 The experiments were all repeated three times and the concentrations reported here were  
141 corrected for their respective blank concentrations.

142 In this study, the “μgC” was used as weight unit that referring to the mass of carbon for  
143 the OC, EC, WSOC, HULIS-C, and MSOC fractions.

144

## 145 **S5. UV-visible properties**

146 The UV-visible absorption spectra of the BrC fractions (i.e., WSOC, HULIS, and MSOC)  
147 were recorded between the wavelengths of 200 to 700 nm using a UV-2600 UV-vis  
148 spectrophotometer (Shimadzu, Japan). The sample solution was placed in a 1-cm quartz  
149 cuvette and analyzed at 1 nm intervals. Ultrapure water was used as a blank reference for the  
150 WSOC and HULIS solutions, while pure methanol was used for the MSOC fraction. The  
151 field blank sample solution was also used as the blank sample, and the interference from the  
152 instrument and operating blank was determined.

153 The absorption Ångström exponent (AAE) is a measure of the spectral dependence of

154 the light absorption of BrC solutions (Cheng et al., 2016), which was calculated by the  
155 following equation:

$$156 \quad A_{\lambda} = K\lambda^{-AAE} \quad (2)$$

157 where  $A_{\lambda}$  is the absorbance derived from the spectrophotometer at a given wavelength  $\lambda$  (330–  
158 400 nm) and  $K$  is a constant.

159 The mass absorption efficiency at 365 nm ( $MAE_{365}$ ) is an important parameter used to  
160 characterize the light absorbing ability of BrC. It was obtained using the following equation:

$$161 \quad MAE_{\lambda} = \frac{A_{\lambda}}{c \cdot L} \times \ln(10) \quad (3)$$

162 where  $A_{\lambda}$  is the absorbance at  $\lambda$  nm,  $c$  is the carbon concentration of BrC in solution ( $\mu\text{gC}$   
163  $\text{mL}^{-1}$ ), and  $L$  is the absorbing path length.

164

## 165 **S6. Principal component analysis (PCA)**

166 PCA is a widely used chemometric procedure that can transform the original variables to  
167 the principal component by dimension reduction analysis. The principal component (two or  
168 three) generally contain most of the original variable information (Popovicheva et al., 2020).  
169 Thus, in this study, PCA was performed to find out the key factors that may affect the DTT  
170 activities from a series of characteristic of BrC fraction ( $MAE_{365}$ , percentage content of four  
171 fluorophores, and percentage content of R-H, H-C-C=, H-C-O, and Ar-H groups). The main  
172 calculation is based on SPSS version 19 (IBM SPSS Statistics) (Shivani et al., 2019), and the  
173 confidence interval is 95%.

174

## 175 **S7. Quality control**



176 The experimental blank and field blank were both analyzed in this study. The  
177 experimental blank was treated in the same method as it for smoke samples, which was used  
178 to assess the errors that may be introduced in the process of experimental operation and their  
179 repeatability. In this study, the average blank values of sextuple collections of WSOC, HULIS  
180 and MSOC were  $0.28 \pm 0.07 \mu\text{gC}/\text{cm}^2$ ,  $0.12 \pm 0.03 \mu\text{g C}/\text{cm}^2$  and  $0.38 \pm 0.09 \mu\text{gC}/\text{cm}^2$ ,  
181 respectively. The repeatability of analysis procedure was obtained based on one blank filter  
182 sample, which were 3.1%, 2.2% and 4.5% for WSOC, HULIS and MSOC, respectively.

183 The field blank filter (ambient and ignition coal (for coal combustion only)) were  
184 collected follow the procedure for sampling smoke  $\text{PM}_{2.5}$  samples, but without ignited fuel  
185 samples. The field blank filters were treated as the method for smoke samples. The average  
186 values of WSOC, HULIS and MSOC were  $1.8 \pm 0.2 \mu\text{gC}/\text{cm}^2$ ,  $0.7 \pm 0.1 \mu\text{gC}/\text{cm}^2$  and  $5.3 \pm 0.9$   
187  $\mu\text{gC}/\text{cm}^2$ , respectively. They were much less than the values of that in smoke particle.

188 In the present study, all the BrC results were blank-corrected by subtracting an average  
189 field blank value for each sample. The data were present as a mean  $\pm$  standard deviation  
190 based on triplicate analysis of filter sample for each combustion experiment.

191

192

193 **Table S1.** Region, excitation/emission wavelength maxima range and attribution of chromophores in BrC  
 194 emitted from BB and CC

| Region | $\lambda_{\text{ex}}$ max(nm) | $\lambda_{\text{em}}$ max(nm) | Fluorescent compounds               | References                                   |
|--------|-------------------------------|-------------------------------|-------------------------------------|----------------------------------------------|
| I      | 220-250                       | 290-320                       | protein-like amino acid             | (Cui et al., 2016; Coble, 1996)              |
| II     | 220-250                       | 320-380                       | protein-like UV region              | (Mostofa et al., 2011; Mounier et al., 2010) |
| III    | 220-250                       | 380-460                       | fulvic-like                         | (Chen et al., 2003; Santos et al., 2012)     |
| IV     | 250-380                       | 280-380                       | tryptophan-like/microbial byproduct | (Santos et al., 2012; Cui et al., 2016)      |
| V      | 250-380                       | 380-460                       | humic-like organic                  | (Chen et al., 2003; Qin et al., 2018)        |

195  
 196  
 197  
 198  
 199  
 200  
 201

**Table S2.** Results of DTT assay conducted on the WSOC, HULIS and MSOC of smoke samples

|                    | Samples | Calculated by PM mass(pmol/min/ $\mu\text{g}$ ) |               |               |
|--------------------|---------|-------------------------------------------------|---------------|---------------|
|                    |         | WSOC                                            | HULIS         | MSOC          |
| Biomass<br>burning | WS      | 4.5 $\pm$ 3.8                                   | 3.2 $\pm$ 2.8 | 85 $\pm$ 12   |
|                    | RS      | 6.1 $\pm$ 0.5                                   | 5.5 $\pm$ 0.6 | 84 $\pm$ 5.6  |
|                    | CS      | 7.4 $\pm$ 1.4                                   | 3.0 $\pm$ 0.7 | 69 $\pm$ 11   |
|                    | PW      | 5.9 $\pm$ 3.3                                   | 3.1 $\pm$ 0.3 | 9.1 $\pm$ 1.5 |
|                    | CF      | 5.5 $\pm$ 2.3                                   | 3.2 $\pm$ 0.9 | 14 $\pm$ 6.9  |
|                    | WP      | 5.6 $\pm$ 2.8                                   | 2.6 $\pm$ 1.0 | 11 $\pm$ 7.6  |
| Coal<br>combustion | B-1     | 1.6 $\pm$ 0.2                                   | 1.1 $\pm$ 0.1 | 7.7 $\pm$ 0.8 |
|                    | B-2     | 2.1 $\pm$ 0.2                                   | 1.5 $\pm$ 0.1 | 11 $\pm$ 3.2  |
|                    | B-3     | 0.5 $\pm$ 0.1                                   | 0.5 $\pm$ 0.1 | 3.2 $\pm$ 1.7 |
|                    | B-4     | 1.9 $\pm$ 0.5                                   | 0.9 $\pm$ 0.2 | 3.1 $\pm$ 1.0 |
|                    | AN      | 0.7 $\pm$ 0.2                                   | 0.4 $\pm$ 0.1 | 6.7 $\pm$ 2.9 |

202 <sup>a</sup> error bars represent standard deviation based on quadruplicate test

203  
 204  
 205

206

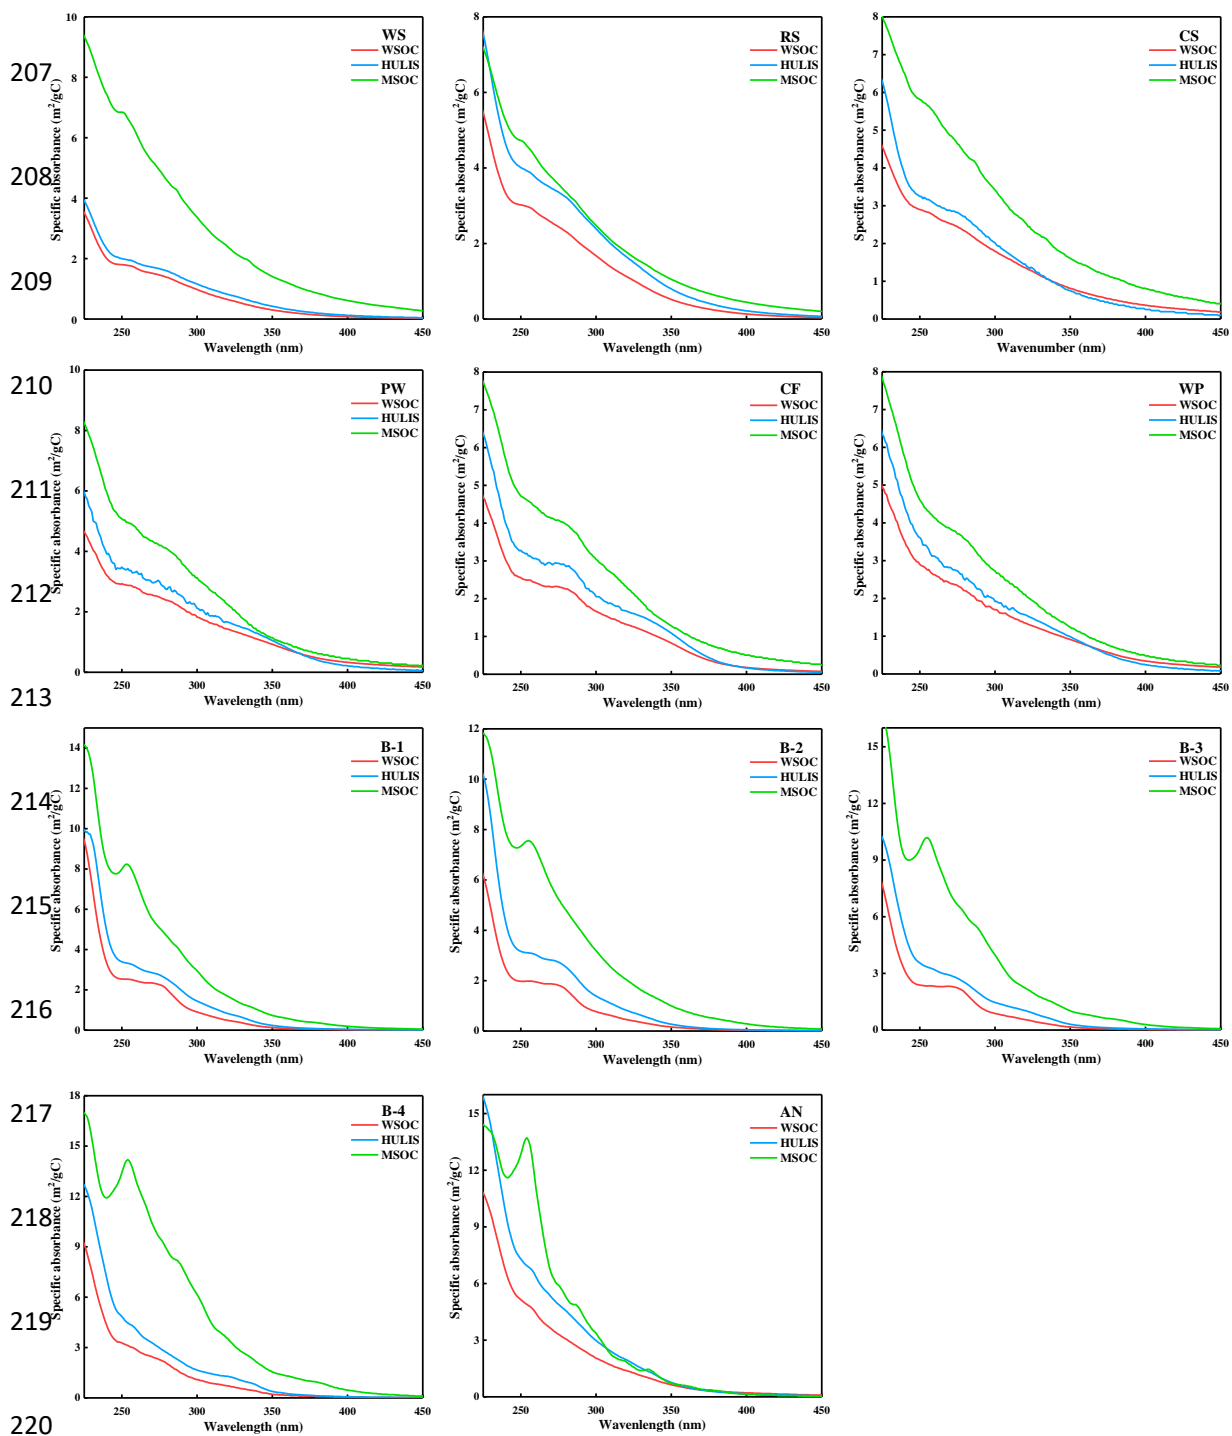

221 **Figure S1.** The normalized UV-vis spectra by organic carbon contents of WSOC, HULIS,

222 and MSOC fractions

223

224

225

226

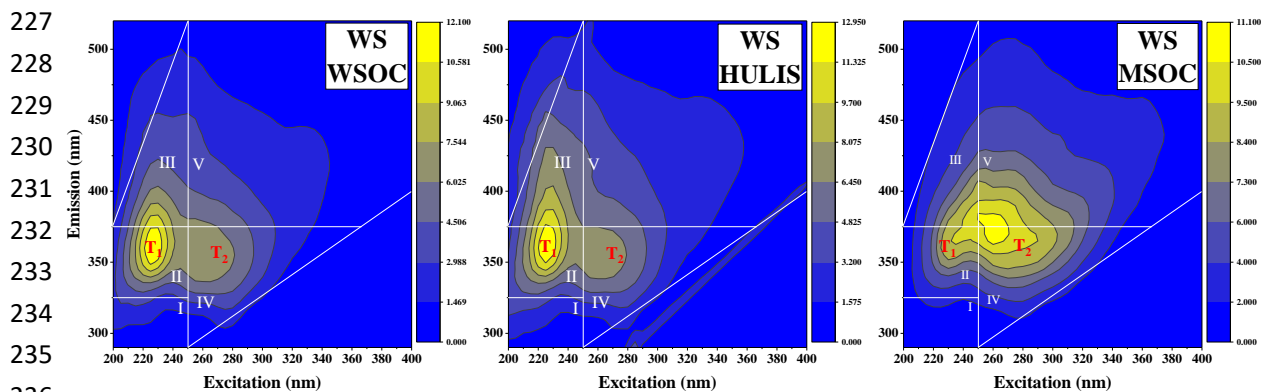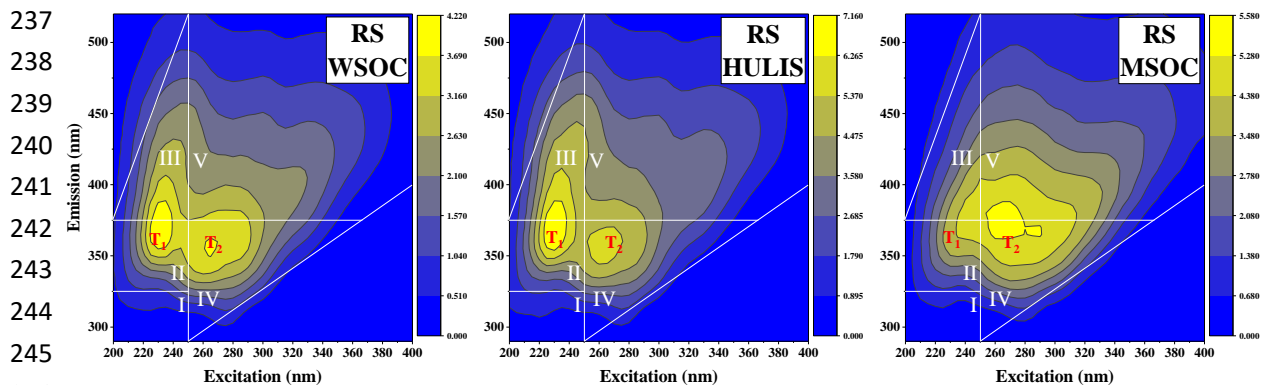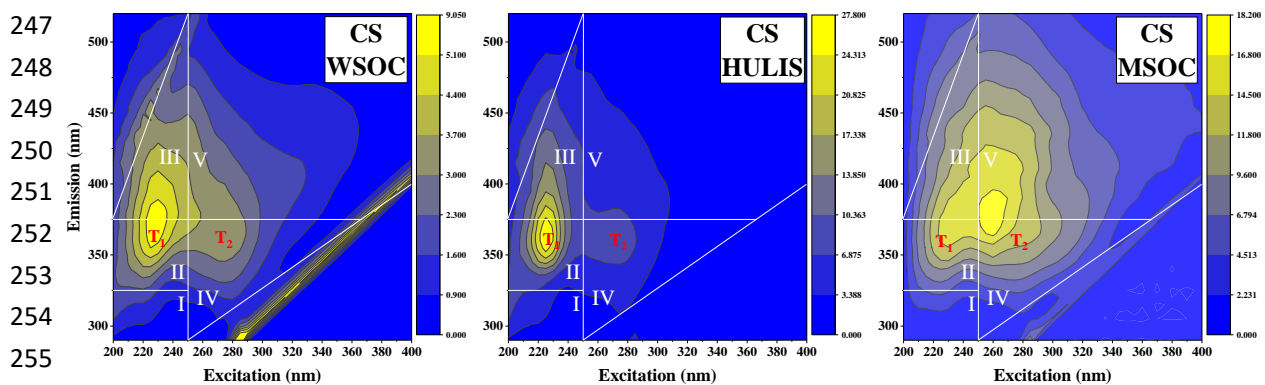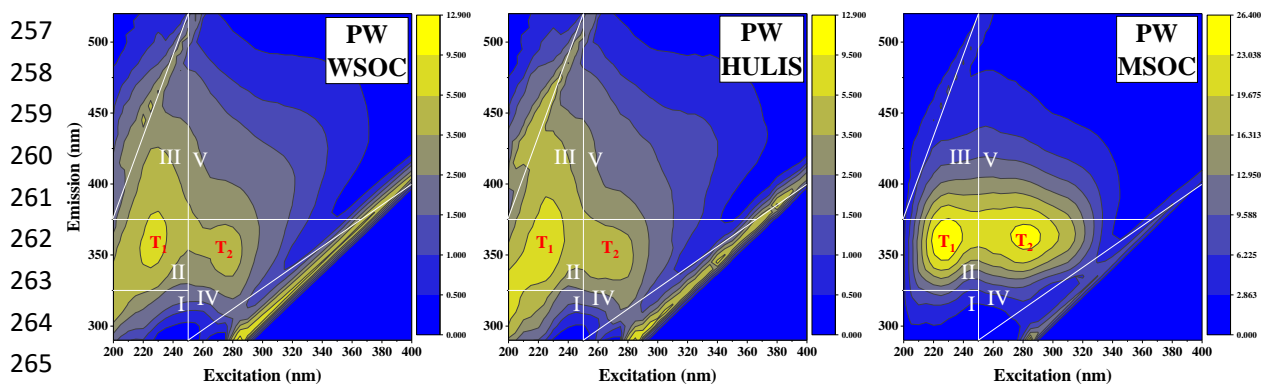

266  
267  
268  
269  
270

271  
272  
273  
274  
275  
276  
277  
278  
279  
280  
281  
282  
283  
284  
285  
286  
287  
288  
289  
290  
291  
292  
293  
294  
295  
296  
297  
298  
299  
300  
301  
302  
303  
304  
305  
306  
307  
308  
309  
310  
311  
312  
313  
314

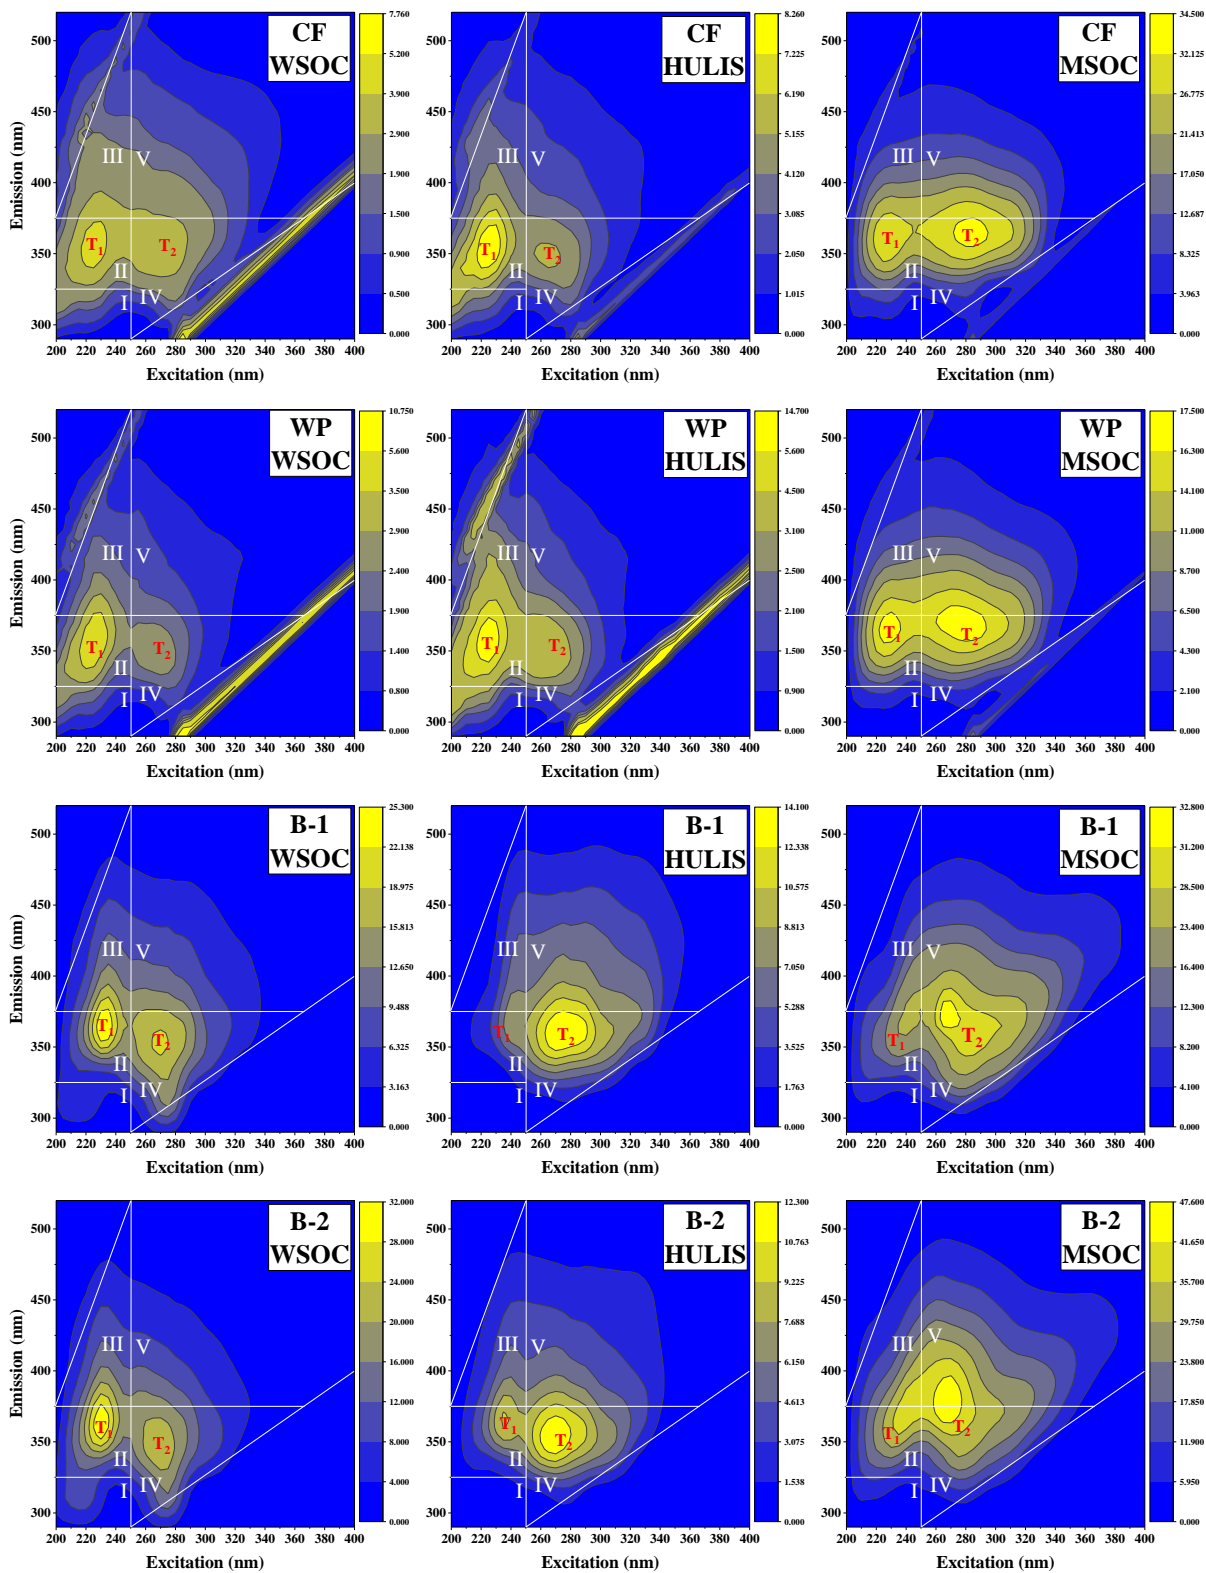

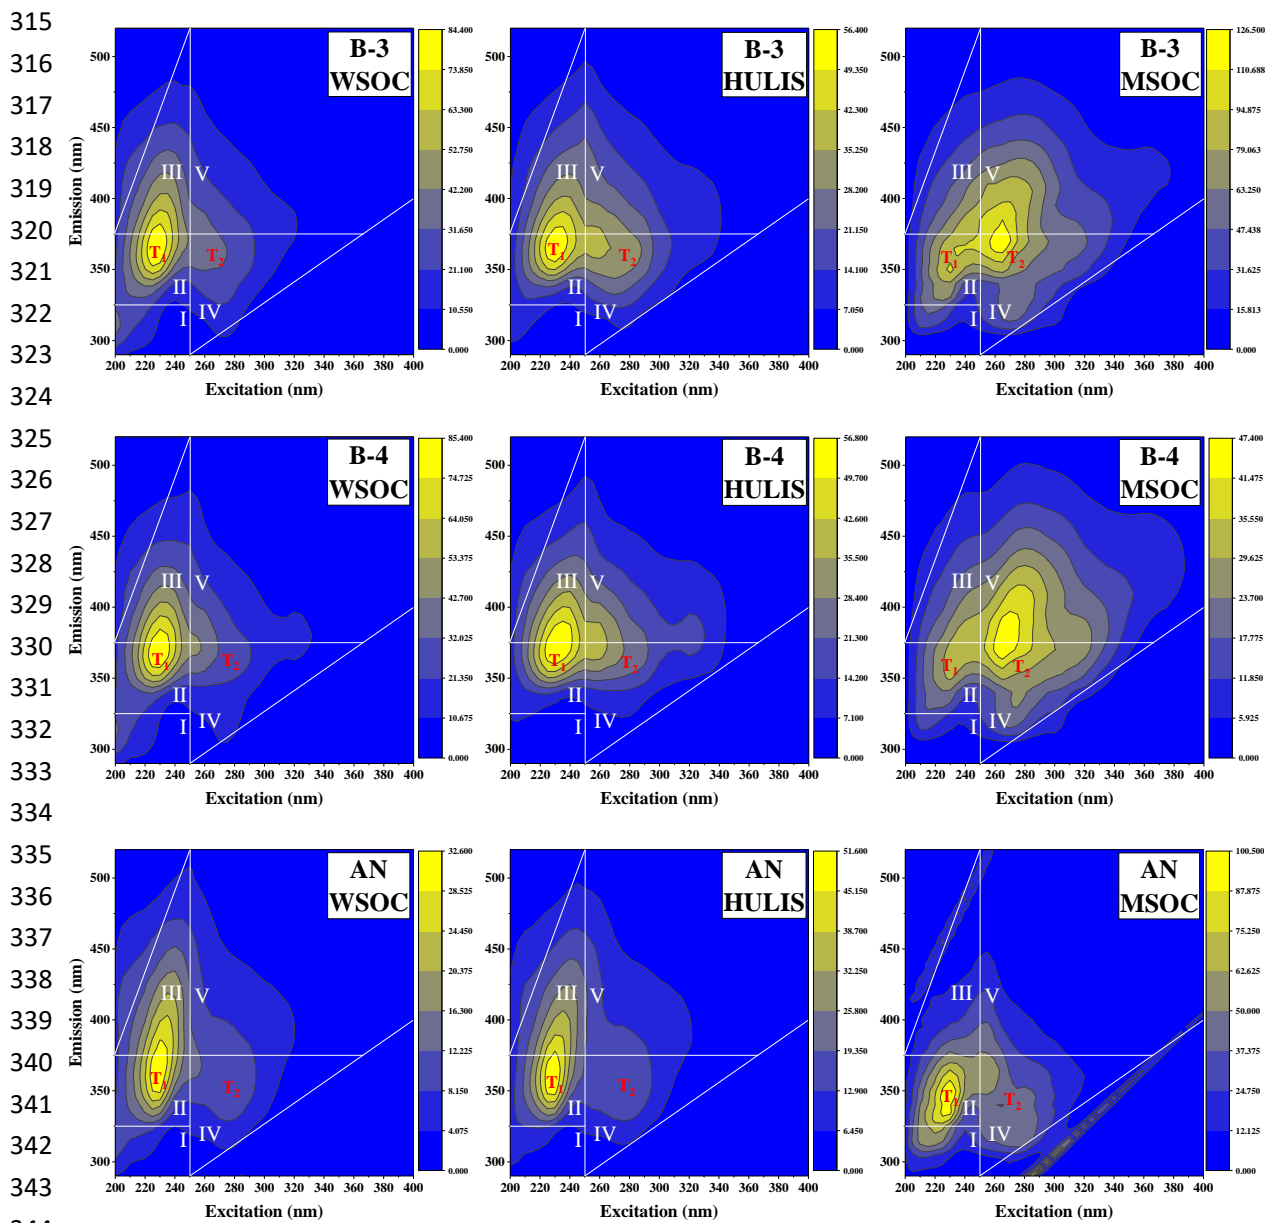

345 **Figure S2.** EEM fluorescence counter maps of corresponding WSOC, HULIS, MSOC of BB  
 346 and CC smoke samples, presented as specific intensity (a.u. L(mg C<sup>-1</sup>))

347

348

349

350

351

352

353

354

355

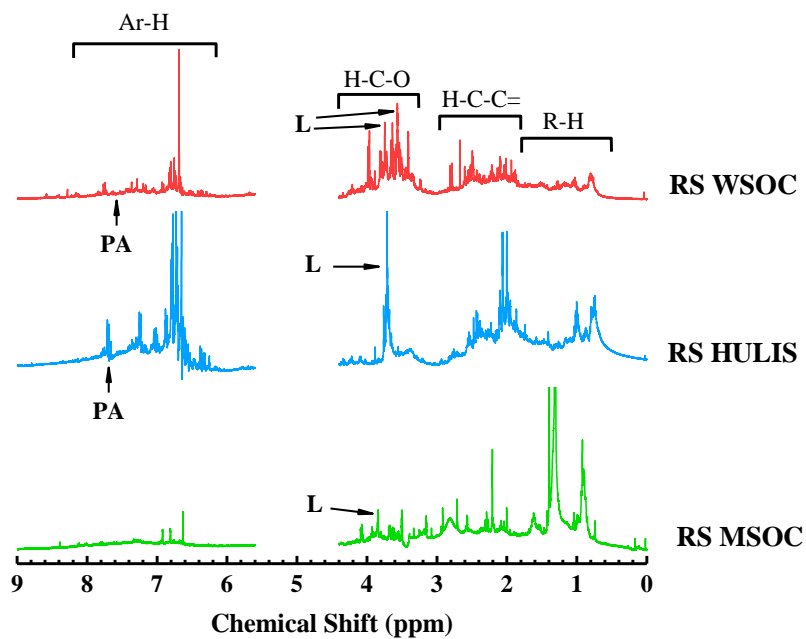

356

357

358

359

360

361

362

363

364

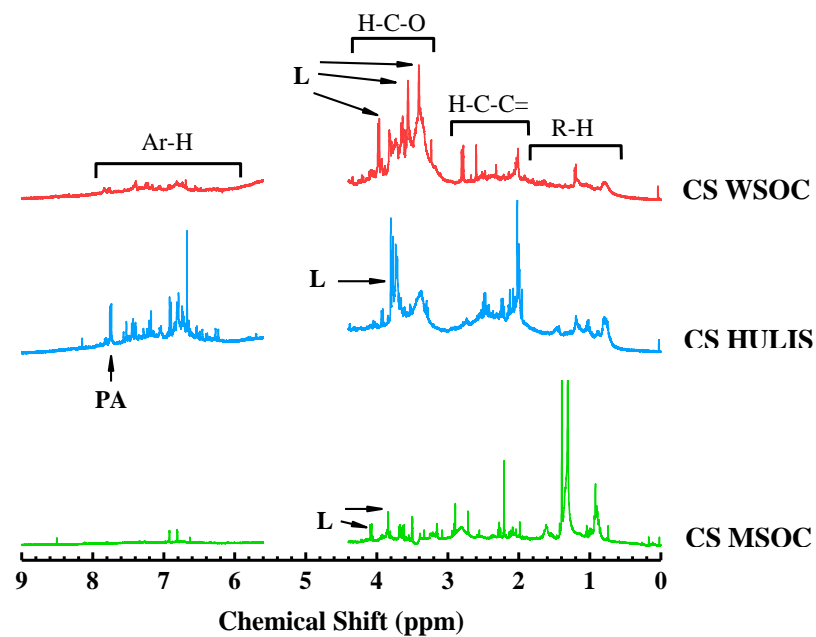

365

366

367

368

369

370

371

372

373

374

375

376

377

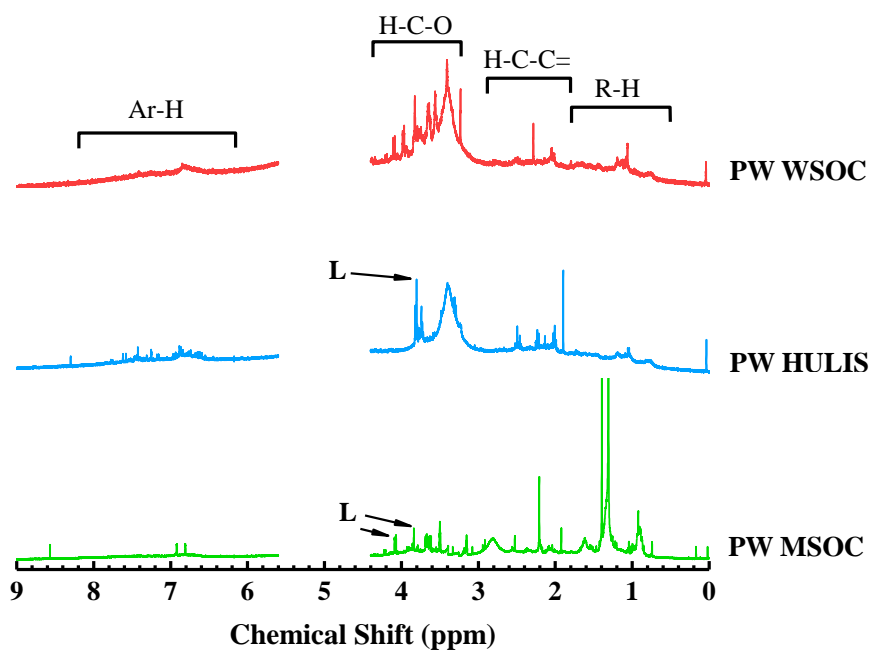

378

379

380

381

382

383

384

385

386

387

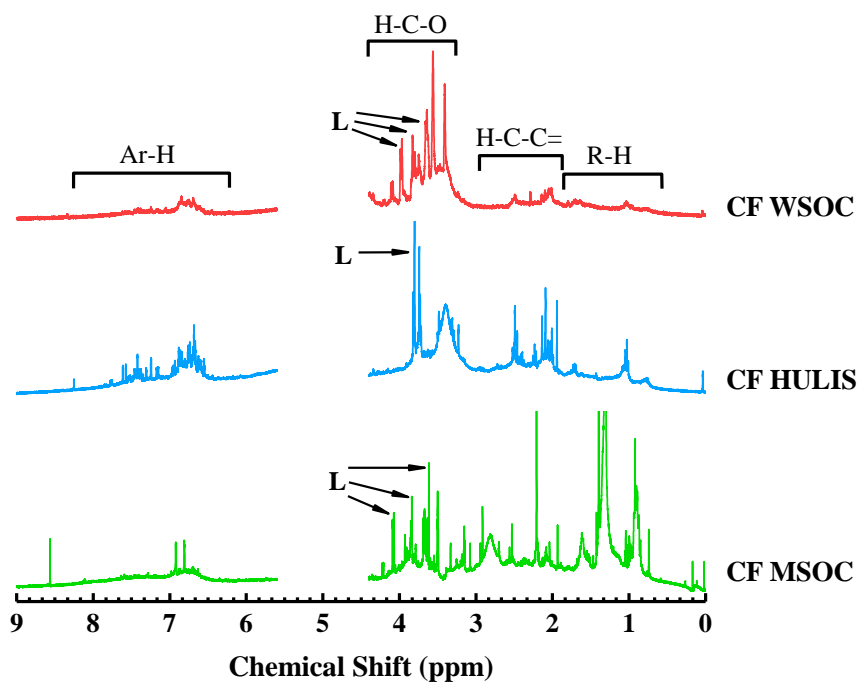

388

389

390

391



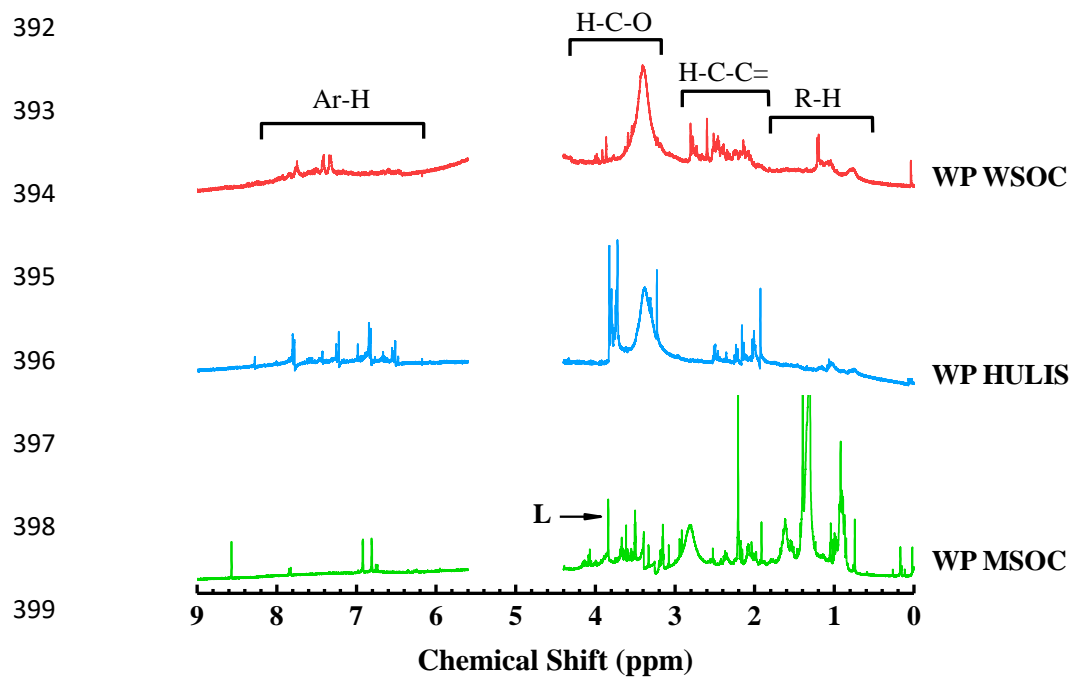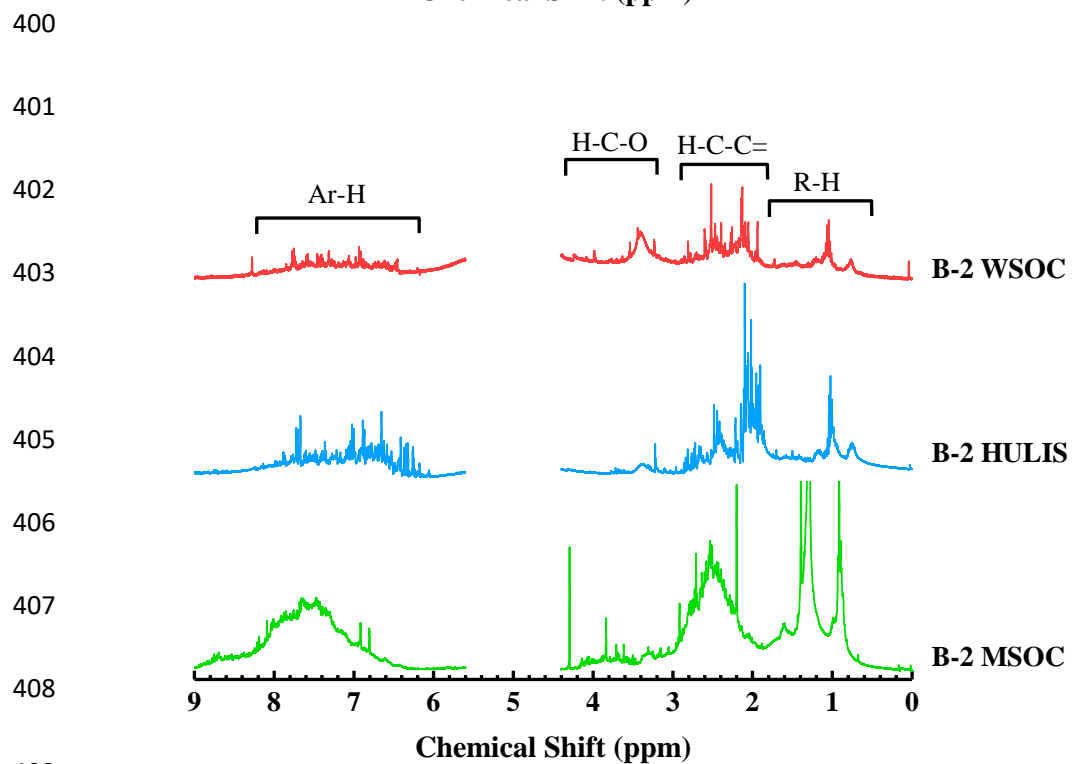

410  
411  
412  
413

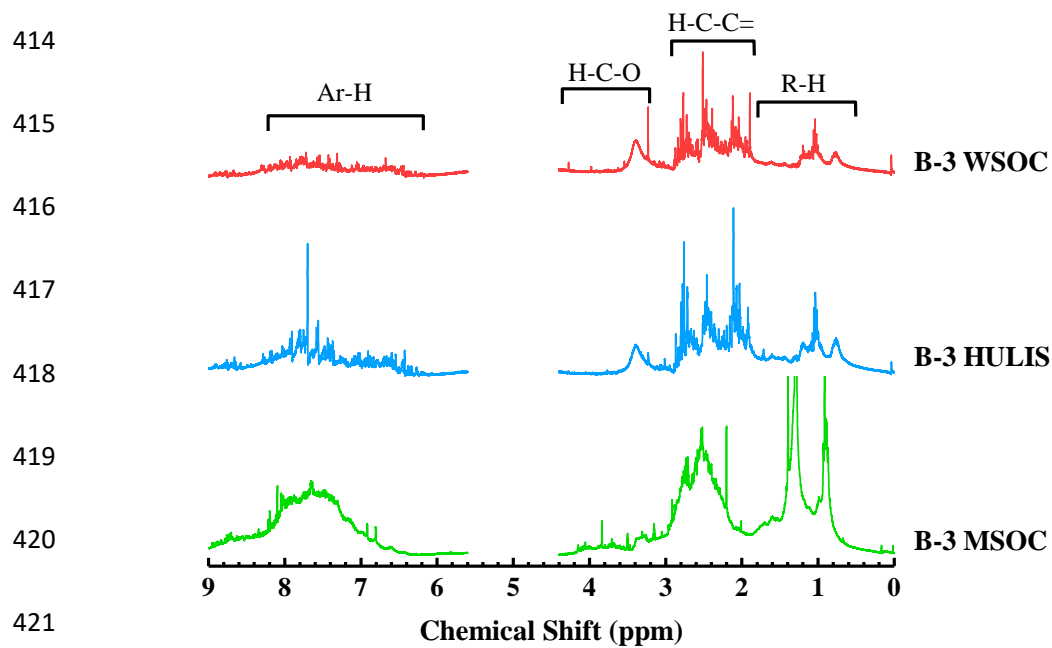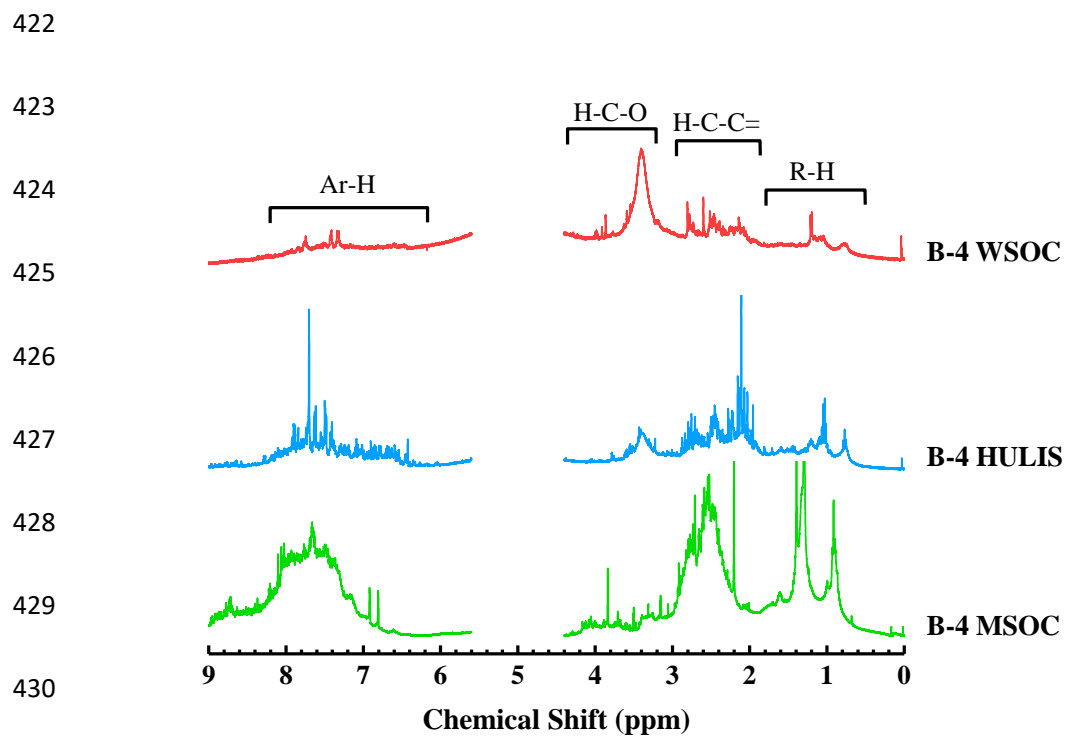

432  
433  
434  
435

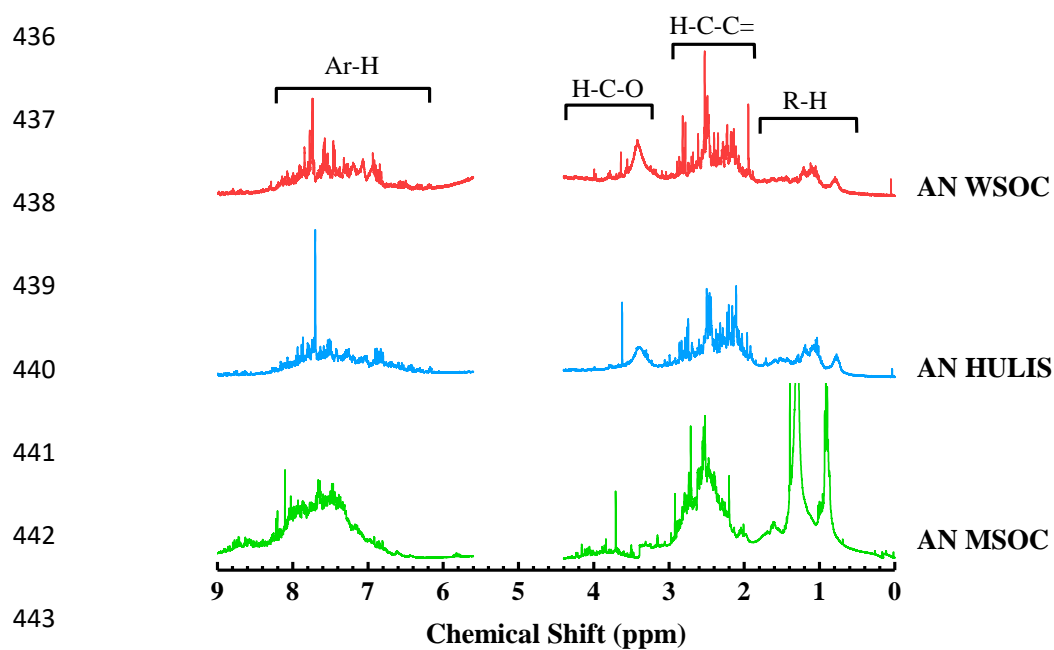

445 **Figure S3.**  $^1\text{H-NMR}$  stacking diagram of corresponding WSOC, HULIS, MSOC of BB and  
 446 CC smoke samples. The segment from 4.40 to 5.60 ppm was removed for NMR spectra due  
 447 to MeOH and  $\text{H}_2\text{O}$  residues. The peaks were assigned to specific compounds as follows:  
 448 Levoglucosan (L), Phthalic acid (PA).

449

450 **References**

- 451 Chen, W., Westerhoff, P., Leenheer, J. A., and Booksh, K.: Fluorescence excitation - Emission  
452 matrix regional integration to quantify spectra for dissolved organic matter,  
453 *Environmental science & technology*, 37, 5701-5710, 10.1021/es034354c, 2003.
- 454 Chen, Y., and Bond, T. C.: Light absorption by organic carbon from wood combustion,  
455 *Atmospheric Chemistry and Physics*, 10, 1773-1787, DOI 10.5194/acp-10-1773-2010,  
456 2010.
- 457 Cheng, Y., He, K. B., Du, Z. Y., Engling, G., Liu, J. M., Ma, Y. L., Zheng, M., and Weber, R.  
458 J.: The characteristics of brown carbon aerosol during winter in Beijing, *Atmospheric*  
459 *Environment*, 127, 355-364, 10.1016/j.atmosenv.2015.12.035, 2016.
- 460 Cheng, Y., He, K. B., Engling, G., Weber, R., Liu, J. M., Du, Z. Y., and Dong, S. P.: Brown  
461 and black carbon in Beijing aerosol: Implications for the effects of brown coating on  
462 light absorption by black carbon, *The Science of the total environment*, 599-600,  
463 1047-1055, 10.1016/j.scitotenv.2017.05.061, 2017.
- 464 Chow, J. C., Watson, J. G., Crow, D., Lowenthal, D. H., and Merrifield, T.: Comparison of  
465 IMPROVE and NIOSH carbon measurements, *Aerosol Science and Technology*, 34,  
466 23-34, 10.1080/027868201300081923, 2001.
- 467 Coble, P. G.: Characterization of marine and terrestrial DOM in seawater using excitation  
468 emission matrix spectroscopy, *Marine Chemistry*, 51, 325-346,  
469 10.1016/0304-4203(95)00062-3, 1996.
- 470 Cui, X., Zhou, D., Fan, W., Huo, M., Crittenden, J. C., Yu, Z., Ju, P., and Wang, Y.: The  
471 effectiveness of coagulation for water reclamation from a wastewater treatment plant

472 that has a long hydraulic and sludge retention times: A case study, *Chemosphere*, 157,  
473 224-231, 10.1016/j.chemosphere.2016.05.009, 2016.

474 Fan, X., Li, M., Cao, T., Cheng, C., Li, F., Xie, Y., Wei, S., Song, J., and Peng, P. a.: Optical  
475 properties and oxidative potential of water-and alkaline-soluble brown carbon in smoke  
476 particles emitted from laboratory simulated biomass burning, *Atmospheric Environment*,  
477 194, 48-57, 10.1016/j.atmosenv.2018.09.025, 2018.

478 Fan, X. J., Wei, S. Y., Zhu, M. B., Song, J. Z., and Peng, P. A.: Comprehensive  
479 characterization of humic-like substances in smoke PM<sub>2.5</sub> emitted from the combustion  
480 of biomass materials and fossil fuels, *Atmospheric Chemistry and Physics*, 16,  
481 13321-13340, 10.5194/acp-16-13321-2016, 2016.

482 Katsumi, N., Miyake, S., Okochi, H., Minami, Y., Kobayashi, H., Kato, S., Wada, R.,  
483 Takeuchi, M., Toda, K., and Miura, K.: Humic-like substances global levels and  
484 extraction methods in aerosols, *Environmental Chemistry Letters*, 17, 1023-1029,  
485 10.1007/s10311-018-00820-6, 2018.

486 Ke, H., Gong, S., He, J., Zhou, C., Zhang, L., and Zhou, Y.: Spatial and temporal distribution  
487 of open bio-mass burning in China from 2013 to 2017, *Atmospheric Environment*, 210,  
488 156-165, 10.1016/j.atmosenv.2019.04.039, 2019.

489 Li, M., Fan, X., Zhu, M., Zou, C., Song, J., Wei, S., Jia, W., and Peng, P.: Abundances and  
490 light absorption properties of brown carbon emitted from residential coal combustion in  
491 China, *Environmental science & technology*, 10.1021/acs.est.8b05630, 2018.

492 Mostofa, K. M. G., Wu, F. C., Liu, C. Q., Vione, D., Yoshioka, T., Sakugawa, H., and Tanoue,  
493 E.: Photochemical, microbial and metal complexation behavior of fluorescent dissolved

494 organic matter in the aquatic environments, *Geochem. J.*, 45, 235-254, 2011.

495 Mounier, S., Zhao, H., Garnier, C., and Redon, R.: Copper complexing properties of  
496 dissolved organic matter: PARAFAC treatment of fluorescence quenching,  
497 *Biogeochemistry*, 106, 107-116, 10.1007/s10533-010-9486-6, 2010.

498 Popovicheva, O., Ivanov, A., and Vojtisek, M.: Functional Factors of Biomass Burning  
499 Contribution to Spring Aerosol Composition in a Megacity: Combined FTIR-PCA  
500 Analyses, *Atmosphere*, 11, 319, 10.3390/atmos11040319, 2020.

501 Qin, J., Zhang, L., Zhou, X., Duan, J., Mu, S., Xiao, K., Hu, J., and Tan, J.: Fluorescence  
502 fingerprinting properties for exploring water-soluble organic compounds in PM 2.5 in an  
503 industrial city of northwest China, *Atmospheric Environment*, 184, 203-211,  
504 10.1016/j.atmosenv.2018.04.049, 2018.

505 Santos, P. S., Santos, E. B., and Duarte, A. C.: First spectroscopic study on the structural  
506 features of dissolved organic matter isolated from rainwater in different seasons, *The  
507 Science of the total environment*, 426, 172-179, 10.1016/j.scitotenv.2012.03.023, 2012.

508 Shen, G., Chen, Y., Wei, S., Fu, X., Zhu, Y., and Tao, S.: Mass absorption efficiency of  
509 elemental carbon for source samples from residential biomass and coal combustions,  
510 *Atmospheric Environment*, 79, 79-84, 10.1016/j.atmosenv.2013.05.082, 2013.

511 Shivani, Gadi, R., Sharma, S. K., and Mandal, T. K.: Seasonal variation, source  
512 apportionment and source attributed health risk of fine carbonaceous aerosols over  
513 National Capital Region, India, *Chemosphere*, 237, 124500,  
514 10.1016/j.chemosphere.2019.124500, 2019.

515 Verma, V., Rico-Martinez, R., Kotra, N., King, L., Liu, J., Snell, T. W., and Weber, R. J.:

516 Contribution of water-soluble and insoluble components and their  
517 hydrophobic/hydrophilic subfractions to the reactive oxygen species-generating  
518 potential of fine ambient aerosols, *Environmental science & technology*, 46,  
519 11384-11392, 10.1021/es302484r, 2012.

520 Wu, C., Huang, X. H. H., Ng, W. M., Griffith, S. M., and Yu, J. Z.: Inter-comparison of  
521 NIOSH and IMPROVE protocols for OC and EC determination: implications for  
522 inter-protocol data conversion, *Atmospheric Measurement Techniques*, 9, 4547-4560,  
523 10.5194/amt-9-4547-2016, 2016.

524 Zhang, X., Lin, Y. H., Surratt, J. D., and Weber, R. J.: Sources, composition and absorption  
525 Angstrom exponent of light-absorbing organic components in aerosol extracts from the  
526 Los Angeles Basin, *Environmental science & technology*, 47, 3685-3693,  
527 10.1021/es305047b, 2013.

528 Zheng, G., He, K., Duan, F., Cheng, Y., and Ma, Y.: Measurement of humic-like substances  
529 in aerosols: a review, *Environmental pollution*, 181, 301-314,  
530 10.1016/j.envpol.2013.05.055, 2013.

531

532
